# Supplementary material
Source: PubMed Central journal article supplement (PMC2773272)

**Supplementary Table 1** Meta-analysis including Sorbian, DGI and 58BC cohorts for SNPs with a P-value < 0.001 in the Sorbs

| SNP        | Z-score | Meta P-value | Direction | P-value Sorbs | P-value 58BC | P-value DGI |
|------------|---------|--------------|-----------|---------------|--------------|-------------|
| rs1976930  | 5.102   | 3.369E-07    | +++       | 0.00049       | 0.0345       | 0.0013      |
| rs7740575  | -4.97   | 6.7E-07      | ---       | 8.17E-06      | 0.018        | 0.040       |
| rs1569019  | 4.888   | 0.0000102    | +++       | 0.00075       | 0.0587       | 0.0015      |
| rs4557669  | 4.633   | 0.00003601   | +++       | 0.00007       | 0.0419       | 0.0284      |
| rs2471943  | 4.453   | 0.000008461  | +++       | 0.00004       | 0.0305       | 0.0847      |
| rs6984050  | 3.885   | 0.0001022    | +++       | 0.00045       | 0.0768       | 0.0975      |
| rs13251380 | 3.882   | 0.0001037    | +++       | 0.00047       | 0.0568       | 0.1207      |
| rs4560755  | 3.868   | 0.0001095    | +++       | 0.00049       | 0.0698       | 0.1065      |
| rs9456801  | -3.786  | 0.0001534    | ---       | 0.00003       | 0.0928       | 0.2916      |
| rs1542178  | 3.784   | 0.0001546    | +++       | 0.00030       | 0.5183       | 0.0211      |
| rs5771222  | -3.753  | 0.0001745    | ---       | 0.00032       | 0.4800       | 0.0257      |
| rs7450548  | -3.739  | 0.0001846    | ---       | 0.00005       | 0.0736       | 0.3302      |
| rs4091546  | -3.734  | 0.0001886    | ---       | 0.00004       | 0.0769       | 0.3498      |
| rs872683   | -3.673  | 0.0002393    | ---       | 0.00017       | 0.8716       | 0.0160      |
| rs10507349 | 3.565   | 0.0003639    | +++       | 0.00093       | 0.1146       | 0.1378      |
| rs3908324  | -3.525  | 0.0004232    | +/-       | 0.00023       | 0.8857       | 0.0128      |
| rs817015   | -3.513  | 0.0004437    | -?-       | 0.00050       |              | 0.0842      |
| rs137866   | -3.509  | 0.0004495    | ---       | 0.00058       | 0.6238       | 0.0311      |
| rs152837   | 3.507   | 0.0004527    | +++       | 0.00032       | 0.8694       | 0.0223      |
| rs7138495  | 3.504   | 0.0004585    | +++       | 0.00023       | 0.5687       | 0.0582      |
| rs371606   | -3.474  | 0.0005133    | +/-       | 0.00024       | 0.3728       | 0.0026      |
| rs8056945  | -3.433  | 0.0005966    | ---       | 0.00080       | 0.0271       | 0.4517      |
| rs7966378  | 3.388   | 0.0007031    | +++       | 0.00038       | 0.9888       | 0.0237      |
| rs11195417 | -3.347  | 0.0008164    | ---       | 0.00071       | 0.4241       | 0.0868      |
| rs6930532  | -3.341  | 0.0008361    | ---       | 0.00062       | 0.0616       | 0.4066      |
| rs7966506  | 3.332   | 0.0008633    | +++       | 0.00015       | 0.6716       | 0.0958      |
| rs7966485  | 3.329   | 0.0008713    | +++       | 0.00015       | 0.6987       | 0.0910      |
| rs17690928 | -3.319  | 0.000905     | +/-       | 0.00032       | 0.8132       | 0.0204      |
| rs17033062 | -3.32   | 0.000907     | ---       | 6.71E-06      | 0.422        | 0.433       |
| rs1795849  | 3.317   | 0.0009102    | +++       | 0.00073       | 0.5261       | 0.0712      |
| rs11646174 | -3.292  | 0.0009933    | ---       | 0.00088       | 0.0403       | 0.4901      |
| rs337865   | 3.26    | 0.001116     | +++       | 0.00084       | 0.0180       | 0.7034      |
| rs681761   | 3.254   | 0.001138     | +++       | 0.00046       | 0.6084       | 0.0878      |
| rs4761492  | 3.202   | 0.001366     | +/-       | 0.00057       | 0.6399       | 0.0144      |
| rs4835587  | -3.195  | 0.001396     | ---       | 0.00058       | 0.1557       | 0.3409      |
| rs11942278 | 3.169   | 0.00153      | +++       | 0.00074       | 0.9914       | 0.0377      |
| rs10123421 | -3.169  | 0.001532     | +/-       | 0.00033       | 0.1159       | 0.0016      |
| rs12659589 | -3.164  | 0.001558     | ---       | 0.00046       | 0.5371       | 0.1365      |
| rs4556800  | -3.14   | 0.001691     | ---       | 0.00046       | 0.0957       | 0.5307      |
| rs11648369 | -3.099  | 0.001943     | ---       | 0.00025       | 0.0881       | 0.6848      |
| rs1552411  | 3.088   | 0.002017     | +/-       | 0.00008       | 0.6213       | 0.0576      |
| rs16987276 | -3.085  | 0.002037     | ---       | 0.00054       | 0.0277       | 0.8783      |
| rs4762485  | 3.077   | 0.002089     | +++       | 0.00038       | 0.7111       | 0.1304      |
| rs11110901 | 3.068   | 0.002158     | +++       | 0.00066       | 0.6093       | 0.1322      |
| rs1473467  | 3.045   | 0.002327     | +/-       | 0.00008       | 0.4735       | 0.0446      |
| rs4889018  | -3.037  | 0.002386     | ---       | 0.00033       | 0.0655       | 0.7904      |
| rs935119   | 3.033   | 0.002425     | +?+       | 0.00048       |              | 0.2693      |
| rs17126675 | -3.026  | 0.002477     | ---       | 0.00095       | 0.7166       | 0.1011      |
| rs2664355  | -2.995  | 0.002748     | ---       | 0.00092       | 0.5100       | 0.1763      |
| rs6499507  | -2.968  | 0.002997     | +/-       | 0.00003       | 0.6171       | 0.1238      |
| rs17710226 | 2.966   | 0.003015     | +++       | 0.00085       | 0.4243       | 0.2371      |
| rs11842594 | -2.961  | 0.003067     | ---       | 0.00063       | 0.1969       | 0.4705      |

|            |        |          |     |         |        |        |
|------------|--------|----------|-----|---------|--------|--------|
| rs9535786  | 2.956  | 0.003117 | +++ | 0.00007 | 0.6482 | 0.3495 |
| rs1281132  | -2.944 | 0.003238 | --- | 0.00037 | 0.9927 | 0.1108 |
| rs17655374 | -2.936 | 0.003323 | --- | 0.00022 | 0.4928 | 0.3469 |
| rs7196399  | -2.934 | 0.003344 | + - | 0.00005 | 0.6171 | 0.1128 |
| rs7998770  | 2.933  | 0.00336  | +++ | 0.00057 | 0.3339 | 0.3609 |
| rs2058522  | -2.903 | 0.003694 | --- | 0.00030 | 0.5308 | 0.3148 |
| rs9535867  | 2.901  | 0.003716 | +++ | 0.00076 | 0.2930 | 0.3904 |
| rs1373609  | -2.856 | 0.004284 | --+ | 0.00016 | 0.0505 | 0.8049 |
| rs376563   | 2.835  | 0.004583 | +++ | 0.00015 | 0.2744 | 0.6953 |
| rs11011857 | -2.808 | 0.004989 | + - | 0.00028 | 0.2847 | 0.0290 |
| rs9515075  | 2.804  | 0.005048 | +++ | 0.00067 | 0.3385 | 0.4457 |
| rs7989215  | -2.767 | 0.005666 | --- | 0.00037 | 0.6669 | 0.3188 |
| rs8083086  | 2.754  | 0.005884 | +++ | 0.00018 | 0.5526 | 0.4856 |
| rs4346474  | -2.747 | 0.006014 | --- | 0.00023 | 0.3743 | 0.6134 |
| rs1368589  | -2.719 | 0.006541 | --+ | 0.00073 | 0.0568 | 0.9241 |
| rs713261   | 2.715  | 0.006629 | + + | 0.00007 | 0.6609 | 0.2017 |
| rs7539852  | 2.706  | 0.006807 | +++ | 0.00065 | 0.7012 | 0.2888 |
| rs10512079 | 2.699  | 0.006954 | +++ | 0.00028 | 0.5953 | 0.4484 |
| rs821366   | 2.698  | 0.006981 | +++ | 0.00055 | 0.7045 | 0.3089 |
| rs10863785 | 2.673  | 0.007524 | +++ | 0.00078 | 0.6110 | 0.3408 |
| rs11660242 | -2.644 | 0.008201 | --- | 0.00066 | 0.3146 | 0.6312 |
| rs1469906  | -2.643 | 0.008226 | --- | 0.00062 | 0.5803 | 0.4103 |
| rs9283747  | 2.632  | 0.008482 | +++ | 0.00005 | 0.4948 | 0.8375 |
| rs1835668  | 2.628  | 0.008576 | +++ | 0.00015 | 0.3750 | 0.8019 |
| rs12403352 | -2.627 | 0.008625 | + - | 0.00051 | 0.4391 | 0.0713 |
| rs6957383  | 2.614  | 0.008944 | +++ | 0.00003 | 0.7603 | 0.7164 |
| rs7244606  | -2.612 | 0.009004 | --- | 0.00098 | 0.6169 | 0.3584 |
| rs9531226  | -2.609 | 0.009085 | --- | 0.00040 | 0.7097 | 0.4111 |
| rs4906835  | -2.607 | 0.009133 | + - | 0.00014 | 0.7801 | 0.2603 |
| rs2994394  | 2.596  | 0.00943  | + + | 0.00029 | 0.8262 | 0.2280 |
| rs7500119  | -2.593 | 0.009501 | + - | 0.00003 | 0.4115 | 0.2109 |
| rs11208264 | -2.585 | 0.00975  | --- | 0.00024 | 0.6072 | 0.5700 |
| rs9498354  | -2.579 | 0.009919 | --- | 0.00054 | 0.2862 | 0.7710 |
| rs7672790  | -2.568 | 0.01023  | --+ | 0.00036 | 0.0378 | 0.5416 |
| rs11080598 | -2.566 | 0.01028  | --- | 0.00066 | 0.3580 | 0.6656 |
| rs12709049 | -2.558 | 0.01052  | --- | 0.00089 | 0.1271 | 0.9960 |
| rs7730024  | 2.555  | 0.01061  | +++ | 0.00007 | 0.4718 | 0.9077 |
| rs9860508  | 2.553  | 0.01069  | + - | 0.00038 | 0.1442 | 0.8943 |
| rs986389   | 2.541  | 0.01105  | +++ | 0.00096 | 0.3495 | 0.6430 |
| rs10892228 | 2.54   | 0.01109  | + - | 0.00041 | 0.1870 | 0.9811 |
| rs10859995 | -2.539 | 0.01111  | --+ | 0.00053 | 0.0558 | 0.6584 |
| rs6715864  | 2.532  | 0.01135  | +++ | 0.00095 | 0.3255 | 0.6830 |
| rs10748568 | 2.522  | 0.01166  | + + | 0.00043 | 0.9362 | 0.2865 |
| rs7136406  | 2.506  | 0.01221  | +++ | 0.00097 | 0.7440 | 0.3715 |
| rs3176295  | -2.5   | 0.01241  | + - | 0.00052 | 0.4922 | 0.1213 |
| rs4496483  | 2.483  | 0.01302  | + - | 0.00023 | 0.1502 | 0.7476 |
| rs11208265 | -2.481 | 0.01309  | --- | 0.00024 | 0.7434 | 0.5750 |
| rs12059226 | 2.477  | 0.01326  | +++ | 0.00041 | 0.7642 | 0.4933 |
| rs9836009  | 2.473  | 0.0134   | + - | 0.00038 | 0.1465 | 0.8058 |
| rs11783436 | 2.468  | 0.01359  | + + | 0.00031 | 0.5513 | 0.1863 |
| rs6754390  | 2.468  | 0.0136   | + + | 0.00001 | 0.6505 | 0.5306 |
| rs3016551  | 2.468  | 0.0136   | +++ | 0.00016 | 0.7705 | 0.6225 |
| rs3755702  | 2.463  | 0.01379  | +++ | 0.00002 | 0.7376 | 0.9557 |
| rs2749100  | -2.462 | 0.01381  | --- | 0.00042 | 0.7152 | 0.5386 |
| rs7916509  | 2.453  | 0.01418  | +++ | 0.00012 | 0.6432 | 0.7882 |
| rs11216833 | 2.446  | 0.01444  | + - | 0.00067 | 0.1779 | 0.9332 |

|            |        |         |      |         |        |        |
|------------|--------|---------|------|---------|--------|--------|
| rs12693990 | -2.436 | 0.01485 | ---  | 0.00064 | 0.2378 | 0.9810 |
| rs4837259  | -2.428 | 0.0152  | --+  | 0.00043 | 0.0995 | 0.6574 |
| rs10951890 | 2.412  | 0.01586 | +++  | 0.00016 | 0.7701 | 0.6874 |
| rs9581589  | 2.405  | 0.01617 | + +- | 0.00033 | 0.4806 | 0.1849 |
| rs17067183 | 2.404  | 0.01621 | +++  | 0.00048 | 0.3070 | 0.9687 |
| rs7077236  | 2.395  | 0.01662 | + +- | 0.00091 | 0.8427 | 0.2595 |
| rs6650659  | 2.381  | 0.01728 | ++-  | 0.00045 | 0.1709 | 0.7758 |
| rs2715416  | -2.378 | 0.01739 | ---  | 0.00084 | 0.9267 | 0.3927 |
| SNP_A-     |        |         |      |         |        |        |
| 1841078    | -2.375 | 0.01753 | -?-  | 0.00095 |        | 0.6763 |
| rs12618748 | -2.373 | 0.01763 | --+  | 0.00067 | 0.1850 | 0.8599 |
| rs1886322  | 2.361  | 0.01823 | +++  | 0.00044 | 0.8423 | 0.5451 |
| rs7524424  | 2.359  | 0.01831 | +++  | 0.00072 | 0.3417 | 0.9086 |
| rs7545677  | 2.358  | 0.01837 | +++  | 0.00066 | 0.3426 | 0.9232 |
| rs7853919  | 2.347  | 0.0189  | ++-  | 0.00014 | 0.3251 | 0.7934 |
| rs7666924  | 2.323  | 0.02017 | +++  | 0.00084 | 0.9387 | 0.4325 |
| rs7753779  | -2.317 | 0.0205  | ---  | 0.00042 | 0.8305 | 0.6034 |
| rs651245   | 2.31   | 0.0209  | + +- | 0.00098 | 0.7108 | 0.2487 |
| rs6462085  | -2.292 | 0.02192 | --+  | 0.00059 | 0.3030 | 0.9272 |
| rs198090   | 2.287  | 0.02218 | +++  | 0.00058 | 0.6984 | 0.6858 |
| rs4131198  | -2.279 | 0.02265 | ---  | 0.00094 | 0.8563 | 0.5077 |
| rs10756301 | 2.274  | 0.02295 | + +- | 0.00050 | 0.5500 | 0.2568 |
| rs12943914 | -2.273 | 0.023   | + -  | 0.00079 | 0.1635 | 0.0633 |
| rs964841   | -2.273 | 0.02301 | + -  | 0.00087 | 0.3732 | 0.1387 |
| rs808994   | -2.266 | 0.02346 | ---  | 0.00058 | 0.4922 | 0.8904 |
| rs17564083 | 2.251  | 0.02438 | ++-  | 0.00073 | 0.2087 | 0.7747 |
| rs10461627 | 2.249  | 0.02448 | +?+  | 0.00054 |        | 0.8940 |
| rs12608495 | -2.249 | 0.02448 | ---  | 0.00055 | 0.4411 | 0.9707 |
| rs1151448  | -2.238 | 0.02519 | ---  | 0.00044 | 0.7556 | 0.7379 |
| rs4762486  | 2.23   | 0.02578 | + +- | 0.00035 | 0.8886 | 0.5298 |
| rs6787683  | 2.216  | 0.02667 | ++-  | 0.00019 | 0.3819 | 0.7535 |
| rs9992452  | -2.213 | 0.02692 | + -  | 0.00039 | 0.9707 | 0.5844 |
| rs6507141  | 2.211  | 0.02701 | ++-  | 0.00092 | 0.2819 | 0.8797 |
| rs11678905 | 2.21   | 0.02711 | + +- | 0.00087 | 0.5632 | 0.2544 |
| rs17511481 | 2.204  | 0.02749 | ++-  | 0.00003 | 0.2749 | 0.4078 |
| rs1750410  | 2.2    | 0.02778 | ++-  | 0.00049 | 0.2063 | 0.6497 |
| rs6703955  | 2.177  | 0.02947 | ++-  | 0.00066 | 0.3426 | 0.8612 |
| rs9545074  | -2.169 | 0.03012 | + -  | 0.00028 | 0.1029 | 0.0951 |
| rs4299478  | -2.162 | 0.03059 | ---  | 0.00026 | 0.7908 | 0.8854 |
| rs6463385  | 2.162  | 0.03066 | + +- | 0.00022 | 0.7932 | 0.5966 |
| rs4974444  | -2.159 | 0.03086 | --+  | 0.00016 | 0.7385 | 0.9892 |
| rs11110954 | 2.152  | 0.03139 | ++-  | 0.00001 | 0.3011 | 0.2965 |
| rs487060   | 2.148  | 0.03168 | +++  | 0.00089 | 0.8116 | 0.6839 |
| rs12973614 | -2.14  | 0.03235 | + -  | 0.00094 | 0.1472 | 0.0817 |
| rs4674965  | -2.138 | 0.03255 | + -  | 0.00098 | 0.7748 | 0.4077 |
| rs241333   | 2.136  | 0.03266 | + +- | 0.00055 | 0.2921 | 0.1919 |
| rs6577461  | 2.134  | 0.0328  | ++-  | 0.00041 | 0.4194 | 0.8213 |
| rs4886089  | 2.134  | 0.03288 | + +- | 0.00096 | 0.2232 | 0.1205 |
| rs2369967  | -2.132 | 0.03302 | ---  | 0.00026 | 0.8368 | 0.8797 |
| rs11110939 | 2.128  | 0.03337 | ++-  | 0.00003 | 0.2931 | 0.3353 |
| rs11110931 | 2.128  | 0.03337 | ++-  | 0.00002 | 0.3057 | 0.3418 |
| rs6807093  | -2.128 | 0.03338 | -?-  | 0.00083 |        | 0.9421 |
| rs11110928 | 2.117  | 0.03429 | ++-  | 0.00003 | 0.2931 | 0.3271 |
| rs10499722 | 2.114  | 0.03451 | + +- | 0.00014 | 0.8836 | 0.7852 |
| rs4487238  | -2.113 | 0.0346  | --+  | 0.00002 | 0.3636 | 0.3696 |
| rs2417862  | -2.105 | 0.03525 | --+  | 0.00063 | 0.3627 | 0.7937 |

|            |        |         |     |         |        |        |
|------------|--------|---------|-----|---------|--------|--------|
| rs16839984 | -2.09  | 0.03658 | --+ | 0.00002 | 0.3708 | 0.3655 |
| rs2029830  | 2.09   | 0.03658 | +++ | 0.00074 | 0.8031 | 0.7861 |
| rs11110926 | 2.089  | 0.03672 | ++- | 0.00006 | 0.3772 | 0.4675 |
| rs2966339  | 2.087  | 0.03686 | ++- | 0.00042 | 0.1564 | 0.4380 |
| rs9292674  | 2.081  | 0.03747 | +++ | 0.00046 | 0.7716 | 0.9014 |
| rs7793437  | -2.079 | 0.03764 | --+ | 0.00074 | 0.1937 | 0.5654 |
| rs4851391  | -2.078 | 0.03771 | -+- | 0.00026 | 0.3415 | 0.3260 |
| rs7273527  | -2.071 | 0.03834 | --+ | 0.00091 | 0.0365 | 0.2433 |
| rs876060   | -2.068 | 0.03863 | -+- | 0.00020 | 0.2846 | 0.3112 |
| rs1545240  | 2.058  | 0.03957 | +++ | 0.00098 | 0.6391 | 0.9113 |
| rs11152292 | -2.056 | 0.03975 | --+ | 0.00047 | 0.1909 | 0.4778 |
| rs9817813  | -2.055 | 0.03988 | --+ | 0.00002 | 0.3752 | 0.3250 |
| rs1526383  | 2.054  | 0.03994 | ++- | 0.00035 | 0.5747 | 0.8507 |
| rs3747600  | -2.05  | 0.04041 | -+- | 0.00042 | 0.3949 | 0.3388 |
| rs11891218 | 2.048  | 0.04053 | +++ | 0.00017 | 0.9899 | 0.9246 |
| rs5746906  | 2.047  | 0.04066 | ++- | 0.00077 | 0.6539 | 0.4436 |
| rs187930   | 2.041  | 0.04125 | ++- | 0.00032 | 0.5998 | 0.5286 |
| rs16892538 | 2.036  | 0.04172 | ++- | 0.00063 | 0.3064 | 0.6500 |
| rs16841428 | -2.031 | 0.04223 | -+- | 0.00086 | 0.2300 | 0.1732 |
| rs10075495 | -2.028 | 0.04255 | --+ | 0.00032 | 0.5622 | 0.7935 |
| rs4850966  | -2.025 | 0.0429  | --+ | 0.00039 | 0.5445 | 0.8081 |
| rs2215595  | -2.024 | 0.04297 | --+ | 0.00086 | 0.1362 | 0.4395 |
| rs11639793 | 2.021  | 0.04323 | +++ | 0.00099 | 0.6199 | 0.9700 |
| rs10935042 | -2.018 | 0.04358 | --- | 0.00053 | 0.8938 | 0.8548 |
| rs1684600  | -2.009 | 0.04459 | -+- | 0.00040 | 0.5057 | 0.4597 |
| rs1591581  | -2.001 | 0.04535 | -++ | 0.00002 | 0.9635 | 0.7611 |
| rs9864890  | -1.992 | 0.04639 | --+ | 0.00003 | 0.3422 | 0.3011 |
| rs7724511  | 1.978  | 0.04793 | ++- | 0.00075 | 0.9157 | 0.6977 |
| rs11862530 | -1.978 | 0.04796 | -+- | 0.00026 | 0.4504 | 0.4992 |
| rs1864268  | 1.975  | 0.04828 | ++- | 0.00008 | 0.3906 | 0.4080 |
| rs7636123  | -1.965 | 0.04945 | --+ | 0.00003 | 0.3557 | 0.2909 |
| rs10751481 | 1.963  | 0.04964 | ++- | 0.00042 | 0.1828 | 0.3720 |
| rs860360   | 1.96   | 0.05001 | ++- | 0.00023 | 0.9276 | 0.9683 |
| rs1722361  | 1.956  | 0.05045 | ++- | 0.00029 | 0.2374 | 0.3159 |
| rs7633217  | -1.951 | 0.05108 | --- | 0.00055 | 0.8997 | 0.9245 |
| rs1860198  | 1.95   | 0.05114 | ++- | 0.00055 | 0.7727 | 0.9752 |
| rs11712570 | -1.947 | 0.05158 | --- | 0.00032 | 0.9789 | 0.9534 |
| rs17021660 | 1.945  | 0.05179 | ++- | 0.00080 | 0.8363 | 0.6673 |
| rs3893314  | 1.939  | 0.05249 | ++- | 0.00090 | 0.6316 | 0.9252 |
| rs17261195 | 1.928  | 0.0539  | ++- | 0.00021 | 0.6116 | 0.6612 |
| rs10860760 | 1.926  | 0.05405 | ++- | 0.00003 | 0.3083 | 0.2202 |
| rs6714879  | 1.925  | 0.05418 | ++- | 0.00083 | 0.1677 | 0.1819 |
| rs6807522  | -1.914 | 0.05558 | --+ | 0.00064 | 0.3344 | 0.5560 |
| rs172355   | -1.904 | 0.05686 | -+- | 0.00014 | 0.4183 | 0.6286 |
| rs12200432 | -1.899 | 0.05763 | -+- | 0.00057 | 0.4872 | 0.5002 |
| rs12521697 | -1.895 | 0.05804 | -+- | 0.00023 | 0.4125 | 0.5644 |
| rs707025   | -1.89  | 0.05876 | -+- | 0.00014 | 0.7034 | 0.9041 |
| rs17717216 | -1.889 | 0.05886 | --+ | 0.00065 | 0.3075 | 0.5047 |
| rs241301   | 1.878  | 0.06039 | ++- | 0.00064 | 0.2878 | 0.3372 |
| rs909349   | 1.873  | 0.06109 | ++- | 0.00016 | 0.4411 | 0.6598 |
| rs10509650 | -1.868 | 0.0618  | -+- | 0.00016 | 0.1038 | 0.2699 |
| rs1040887  | -1.863 | 0.06252 | --+ | 0.00040 | 0.5157 | 0.6068 |
| rs825090   | 1.856  | 0.06339 | +-- | 0.00016 | 0.9987 | 0.8427 |
| rs4586937  | 1.853  | 0.06384 | ++- | 0.00022 | 0.4225 | 0.6229 |
| rs11766511 | 1.852  | 0.06397 | ++- | 0.00100 | 0.5543 | 0.5191 |
| rs6040277  | -1.843 | 0.06535 | --+ | 0.00055 | 0.4878 | 0.6073 |

|            |        |         |     |         |        |        |
|------------|--------|---------|-----|---------|--------|--------|
| rs11778878 | 1.836  | 0.06637 | ++- | 0.00095 | 0.5782 | 0.7672 |
| rs12489933 | -1.833 | 0.06683 | -+- | 0.00060 | 0.9251 | 0.9095 |
| rs735403   | 1.827  | 0.06763 | +-+ | 0.00021 | 0.4535 | 0.6825 |
| rs9309009  | -1.827 | 0.06767 | -+- | 0.00027 | 0.1895 | 0.3694 |
| rs935537   | -1.823 | 0.06823 | -+- | 0.00031 | 0.7693 | 0.9085 |
| rs7811179  | -1.817 | 0.06929 | --+ | 0.00026 | 0.6582 | 0.6078 |
| rs9369440  | -1.815 | 0.06955 | -+- | 0.00045 | 0.7398 | 0.8304 |
| rs10910445 | -1.808 | 0.07057 | -+- | 0.00057 | 0.5416 | 0.6363 |
| rs2156044  | 1.808  | 0.07061 | ++- | 0.00069 | 0.6716 | 0.7604 |
| rs10817917 | -1.805 | 0.07104 | --+ | 0.00094 | 0.2583 | 0.4247 |
| rs11654328 | 1.795  | 0.07265 | ++- | 0.00040 | 0.8652 | 0.8095 |
| rs9802436  | 1.792  | 0.0732  | +-+ | 0.00099 | 0.2468 | 0.3173 |
| rs10123800 | -1.786 | 0.07403 | --+ | 0.00071 | 0.2172 | 0.3320 |
| rs11772083 | 1.777  | 0.07564 | ++- | 0.00013 | 0.6377 | 0.4628 |
| rs10865499 | 1.773  | 0.07631 | +-+ | 0.00039 | 0.6386 | 0.8203 |
| rs4276727  | 1.767  | 0.07727 | ++- | 0.00048 | 0.0926 | 0.1503 |
| rs6601002  | 1.76   | 0.07842 | ++- | 0.00082 | 0.0380 | 0.1004 |
| rs2381759  | 1.758  | 0.07867 | +-+ | 0.00080 | 0.2985 | 0.4191 |
| rs11080303 | 1.758  | 0.07883 | ++- | 0.00085 | 0.8741 | 0.9017 |
| rs17818622 | -1.754 | 0.07935 | --+ | 0.00083 | 0.7611 | 0.8039 |
| rs3733202  | 1.751  | 0.07995 | +-+ | 0.00024 | 0.4258 | 0.7208 |
| rs6677151  | -1.747 | 0.08068 | --+ | 0.00060 | 0.7029 | 0.6951 |
| rs10448341 | 1.745  | 0.08102 | ++- | 0.00094 | 0.1745 | 0.2851 |
| rs4965458  | 1.745  | 0.08106 | +-+ | 0.00013 | 0.1471 | 0.4568 |
| rs10233586 | 1.739  | 0.08203 | ++- | 0.00003 | 0.8377 | 0.3846 |
| rs12685159 | 1.722  | 0.08512 | +-+ | 0.00075 | 0.5094 | 0.6591 |
| rs4743860  | 1.719  | 0.0857  | +-+ | 0.00038 | 0.5563 | 0.8165 |
| rs10500769 | -1.715 | 0.08642 | -+- | 0.00071 | 0.3792 | 0.5551 |
| rs7665090  | 1.713  | 0.0867  | +-+ | 0.00034 | 0.4762 | 0.7616 |
| rs216657   | -1.712 | 0.08696 | -+- | 0.00098 | 0.1373 | 0.2560 |
| rs17548372 | -1.708 | 0.08766 | -+- | 0.00098 | 0.2910 | 0.4283 |
| rs2134268  | -1.704 | 0.08834 | -+- | 0.00066 | 0.3593 | 0.5549 |
| rs2108546  | -1.7   | 0.08905 | -+- | 0.00087 | 0.1851 | 0.3342 |
| rs17753534 | 1.699  | 0.08926 | +-+ | 0.00071 | 0.4734 | 0.6591 |
| rs11206628 | 1.698  | 0.08943 | ++- | 0.00075 | 0.7222 | 0.6912 |
| rs12679719 | -1.695 | 0.09002 | ++- | 0.00058 | 0.9382 | 0.9086 |
| rs1576672  | -1.694 | 0.09019 | --+ | 0.00002 | 0.5883 | 0.1974 |
| rs2222807  | 1.692  | 0.09062 | +-- | 0.00016 | 0.7559 | 0.8380 |
| rs10993556 | -1.685 | 0.09199 | -+- | 0.00055 | 0.3651 | 0.6091 |
| rs10888935 | 1.683  | 0.09232 | ++- | 0.00067 | 0.7663 | 0.6912 |
| rs12818068 | 1.663  | 0.09625 | +-+ | 0.00024 | 0.3129 | 0.6986 |
| rs16953178 | -1.657 | 0.09761 | ++- | 0.00002 | 0.5030 | 0.7093 |
| rs11116725 | -1.651 | 0.09868 | --+ | 0.00056 | 0.3165 | 0.2984 |
| rs2886725  | 1.64   | 0.101   | ++- | 0.00050 | 0.9612 | 0.7427 |
| rs13234751 | -1.64  | 0.101   | --+ | 0.00085 | 0.9092 | 0.7914 |
| rs17669013 | 1.64   | 0.1011  | +-- | 0.00029 | 0.7695 | 0.8658 |
| rs17148373 | 1.629  | 0.1034  | +?- | 0.00048 |        | 0.4949 |
| rs3778958  | 1.629  | 0.1034  | ++- | 0.00087 | 0.5756 | 0.5283 |
| rs2049149  | -1.627 | 0.1038  | -+- | 0.00020 | 0.3395 | 0.7948 |
| rs10506459 | 1.609  | 0.1077  | ++- | 0.00064 | 0.8981 | 0.6986 |
| rs16996381 | -1.606 | 0.1083  | -+- | 0.00051 | 0.1807 | 0.4707 |
| rs1919813  | 1.605  | 0.1085  | +-- | 0.00035 | 0.7706 | 0.8495 |
| rs4933411  | 1.602  | 0.1092  | +-+ | 0.00033 | 0.5409 | 0.9622 |
| rs12298127 | -1.589 | 0.112   | ++- | 0.00014 | 0.5962 | 0.8313 |
| rs2863243  | 1.581  | 0.114   | +-- | 0.00011 | 0.5924 | 0.7888 |
| rs10518389 | -1.578 | 0.1145  | ++- | 0.00064 | 0.7440 | 0.9432 |

|            |        |        |     |         |        |        |
|------------|--------|--------|-----|---------|--------|--------|
| rs153822   | -1.573 | 0.1156 | --- | 0.00081 | 0.7628 | 0.9622 |
| rs6544089  | 1.572  | 0.1159 | --- | 0.00051 | 0.4124 | 0.7954 |
| rs12489937 | -1.57  | 0.1164 | --- | 0.00042 | 0.9251 | 0.7195 |
| rs1317138  | 1.57   | 0.1164 | --- | 0.00095 | 0.6328 | 0.5259 |
| rs2354354  | 1.563  | 0.1181 | --- | 0.00048 | 0.4776 | 0.8843 |
| rs1104532  | 1.553  | 0.1204 | --- | 0.00076 | 0.4700 | 0.3678 |
| rs7663154  | -1.539 | 0.1239 | --- | 0.00063 | 0.2278 | 0.5758 |
| rs10035262 | -1.539 | 0.1239 | --- | 0.00081 | 0.6715 | 0.5002 |
| rs1002533  | -1.536 | 0.1246 | --- | 0.00075 | 0.8976 | 0.6446 |
| rs2026834  | -1.534 | 0.125  | --- | 0.00031 | 0.4687 | 0.9834 |
| rs1394279  | 1.531  | 0.1258 | --- | 0.00082 | 0.4758 | 0.3626 |
| rs3778948  | 1.529  | 0.1264 | --- | 0.00088 | 0.6136 | 0.4633 |
| rs2164580  | 1.525  | 0.1272 | --- | 0.00083 | 0.9457 | 0.7650 |
| rs7866312  | -1.523 | 0.1277 | --- | 0.00052 | 0.4767 | 0.3081 |
| rs8832     | -1.521 | 0.1283 | --- | 0.00089 | 0.9650 | 0.7047 |
| rs431747   | -1.517 | 0.1294 | --- | 0.00086 | 0.4053 | 0.7660 |
| rs4933415  | 1.51   | 0.131  | --- | 0.00046 | 0.5143 | 0.9891 |
| rs17125793 | -1.509 | 0.1312 | --- | 0.00100 | 0.7776 | 0.5763 |
| rs7415831  | -1.505 | 0.1324 | --- | 0.00094 | 0.7229 | 0.5248 |
| rs271415   | 1.497  | 0.1343 | --- | 0.00027 | 0.3993 | 0.9761 |
| rs4402506  | 1.494  | 0.1353 | --- | 0.00078 | 0.7617 | 0.5131 |
| rs8102279  | -1.493 | 0.1355 | --- | 0.00025 | 0.7722 | 0.6695 |
| rs7666727  | 1.491  | 0.1361 | --- | 0.00027 | 0.3596 | 0.1723 |
| rs7389827  | 1.49   | 0.1363 | --- | 0.00061 | 0.2648 | 0.1754 |
| rs6835151  | 1.486  | 0.1373 | --- | 0.00096 | 0.4864 | 0.3521 |
| rs6890057  | -1.484 | 0.1378 | --- | 0.00082 | 0.5601 | 0.9666 |
| rs637612   | 1.476  | 0.14   | --- | 0.00051 | 0.4328 | 0.9310 |
| rs10462707 | -1.469 | 0.1418 | --- | 0.00044 | 0.6494 | 0.8297 |
| rs2289548  | 1.468  | 0.142  | --- | 0.00056 | 0.3776 | 0.8630 |
| rs735404   | 1.465  | 0.1429 | --- | 0.00037 | 0.4035 | 0.9646 |
| rs12092202 | 1.453  | 0.1462 | --- | 0.00079 | 0.9007 | 0.7092 |
| rs446291   | 1.452  | 0.1466 | --- | 0.00093 | 0.4848 | 0.9103 |
| rs6683030  | -1.434 | 0.1515 | --- | 0.00004 | 0.9091 | 0.2409 |
| rs9531255  | -1.431 | 0.1523 | --- | 0.00009 | 0.8289 | 0.2597 |
| rs1004811  | 1.425  | 0.154  | --- | 0.00019 | 0.7375 | 0.2836 |
| rs9296115  | 1.421  | 0.1552 | --- | 0.00077 | 0.6072 | 0.3518 |
| rs497898   | -1.415 | 0.1569 | --- | 0.00023 | 0.9128 | 0.4839 |
| rs1572484  | -1.413 | 0.1577 | --- | 0.00004 | 0.9499 | 0.2445 |
| rs3847769  | -1.408 | 0.1591 | --- | 0.00060 | 0.4728 | 0.2432 |
| rs3778968  | 1.396  | 0.1627 | --- | 0.00082 | 0.5756 | 0.3219 |
| rs17249909 | -1.394 | 0.1634 | --- | 0.00031 | 0.5982 | 0.2412 |
| rs7728453  | -1.387 | 0.1656 | --- | 0.00061 | 0.6802 | 0.7618 |
| rs11100491 | -1.382 | 0.167  | --- | 0.00016 | 0.3678 | 0.8435 |
| rs3013688  | -1.381 | 0.1672 | --- | 0.00030 | 0.7837 | 0.5705 |
| rs7825402  | 1.38   | 0.1676 | --- | 0.00080 | 0.9474 | 0.5991 |
| rs17018130 | 1.376  | 0.169  | --- | 0.00079 | 0.7493 | 0.4002 |
| rs3778957  | 1.374  | 0.1694 | --- | 0.00081 | 0.5756 | 0.3043 |
| rs6564307  | -1.373 | 0.1698 | --- | 0.00097 | 0.1274 | 0.5117 |
| rs6917809  | -1.368 | 0.1714 | --- | 0.00073 | 0.9911 | 0.5321 |
| rs17698336 | 1.363  | 0.1728 | --- | 0.00056 | 0.6545 | 0.7421 |
| rs13262005 | -1.363 | 0.1729 | --- | 0.00058 | 0.6868 | 0.3216 |
| rs8059013  | 1.358  | 0.1744 | --- | 0.00002 | 0.5525 | 0.3800 |
| rs16908769 | 1.34   | 0.1801 | --- | 0.00015 | 0.0430 | 0.5356 |
| rs10911810 | 1.339  | 0.1805 | --- | 0.00071 | 0.8560 | 0.4192 |
| rs3985696  | 1.33   | 0.1835 | --- | 0.00065 | 0.6015 | 0.7741 |
| rs10495455 | -1.322 | 0.1862 | --- | 0.00076 | 0.5263 | 0.8604 |

|            |        |        |     |         |        |        |
|------------|--------|--------|-----|---------|--------|--------|
| rs16908826 | 1.32   | 0.1867 | +-+ | 0.00050 | 0.0430 | 0.4082 |
| rs1701698  | -1.318 | 0.1876 | ++  | 0.00022 | 0.4644 | 0.7165 |
| rs7970805  | -1.317 | 0.1877 | ++  | 0.00070 | 0.6633 | 0.7196 |
| rs2171226  | 1.311  | 0.19   | +-- | 0.00002 | 0.4872 | 0.3823 |
| rs10960309 | 1.307  | 0.1913 | ++  | 0.00095 | 0.2706 | 0.8271 |
| rs7695587  | -1.306 | 0.1915 | --+ | 0.00085 | 0.8364 | 0.4011 |
| rs1854445  | 1.303  | 0.1926 | +-- | 0.00039 | 0.4850 | 0.7674 |
| rs11161464 | -1.303 | 0.1926 | ++  | 0.00095 | 0.8185 | 0.6346 |
| rs17233214 | -1.302 | 0.193  | ++  | 0.00028 | 0.4625 | 0.7379 |
| rs6677714  | -1.301 | 0.1933 | ++  | 0.00065 | 0.4990 | 0.8350 |
| rs1248631  | 1.293  | 0.1959 | +-  | 0.00039 | 0.7814 | 0.2805 |
| rs6735216  | -1.283 | 0.1996 | --+ | 0.00031 | 0.7316 | 0.2315 |
| rs7938154  | 1.281  | 0.2001 | +-- | 0.00074 | 0.5768 | 0.7625 |
| rs10747190 | -1.271 | 0.2036 | ++  | 0.00047 | 0.7955 | 0.5154 |
| rs11150194 | -1.262 | 0.207  | +-- | 0.00065 | 0.0265 | 0.3411 |
| rs11113221 | -1.262 | 0.2071 | +-- | 0.00057 | 0.1770 | 0.8140 |
| rs978844   | -1.262 | 0.2071 | ++  | 0.00061 | 0.3363 | 0.9549 |
| rs11649483 | -1.259 | 0.2081 | +-- | 0.00050 | 0.0703 | 0.5712 |
| rs154448   | 1.25   | 0.2113 | +-- | 0.00086 | 0.4290 | 0.8949 |
| rs1539199  | -1.246 | 0.2128 | ++  | 0.00072 | 0.4327 | 0.8559 |
| rs1123315  | -1.245 | 0.2131 | --+ | 0.00009 | 0.7304 | 0.1338 |
| rs10500905 | -1.244 | 0.2134 | ++  | 0.00051 | 0.4098 | 0.8191 |
| rs6827644  | -1.243 | 0.214  | --+ | 0.00086 | 0.4802 | 0.1845 |
| rs1248630  | 1.24   | 0.2149 | +-  | 0.00031 | 0.8984 | 0.2764 |
| rs395136   | -1.24  | 0.2149 | ++  | 0.00044 | 0.6922 | 0.5470 |
| rs12447678 | -1.233 | 0.2174 | ++  | 0.00051 | 0.3993 | 0.8182 |
| rs797206   | -1.231 | 0.2182 | ++  | 0.00050 | 0.6386 | 0.5951 |
| rs1352149  | 1.218  | 0.2234 | +-- | 0.00002 | 0.4846 | 0.3231 |
| rs367015   | -1.217 | 0.2234 | ++  | 0.00046 | 0.7398 | 0.4959 |
| rs4149570  | -1.209 | 0.2266 | ++  | 0.00063 | 0.4293 | 0.7933 |
| rs3756020  | -1.204 | 0.2284 | ++  | 0.00030 | 0.4216 | 0.6808 |
| rs11742890 | -1.204 | 0.2285 | ++  | 0.00084 | 0.7511 | 0.5609 |
| rs17110076 | -1.193 | 0.2328 | --+ | 0.00023 | 0.7104 | 0.1574 |
| rs12062935 | -1.19  | 0.234  | ++  | 0.00028 | 0.6524 | 0.4639 |
| rs4728425  | 1.189  | 0.2345 | +-  | 0.00086 | 0.6796 | 0.2394 |
| rs2072504  | -1.178 | 0.2387 | ++  | 0.00054 | 0.3916 | 0.7735 |
| rs224126   | 1.177  | 0.2392 | +-- | 0.00014 | 0.9905 | 0.2151 |
| rs6749888  | -1.171 | 0.2417 | --+ | 0.00054 | 0.8302 | 0.2511 |
| rs3094303  | -1.158 | 0.2469 | +-- | 0.00026 | 0.0068 | 0.3216 |
| rs4142073  | 1.145  | 0.2521 | +?- | 0.00052 |        | 0.2009 |
| rs13332543 | -1.137 | 0.2556 | ++  | 0.00024 | 0.3651 | 0.6315 |
| rs16834081 | -1.134 | 0.2566 | ++  | 0.00025 | 0.5696 | 0.4596 |
| rs797201   | -1.128 | 0.2595 | ++  | 0.00056 | 0.5684 | 0.5583 |
| rs3013689  | -1.119 | 0.2631 | ++  | 0.00062 | 0.7533 | 0.4369 |
| rs3013685  | -1.118 | 0.2634 | ++  | 0.00069 | 0.7533 | 0.4494 |
| rs797208   | -1.114 | 0.2651 | ++  | 0.00065 | 0.7004 | 0.4730 |
| rs6587622  | -1.102 | 0.2703 | --+ | 0.00100 | 0.4104 | 0.1104 |
| rs12932883 | -1.098 | 0.2723 | +-- | 0.00076 | 0.0525 | 0.6041 |
| rs12908729 | -1.089 | 0.2762 | ++  | 0.00024 | 0.9508 | 0.2244 |
| SNP_A-     |        |        |     |         |        |        |
| 2028734    | 1.057  | 0.2905 | +?- | 0.00073 |        | 0.1864 |
| rs4889814  | -1.053 | 0.2923 | --+ | 0.00070 | 0.9491 | 0.2513 |
| rs10805227 | -1.03  | 0.3031 | --+ | 0.00061 | 0.3174 | 0.0509 |
| rs11942384 | -1.03  | 0.3032 | --+ | 0.00075 | 0.3174 | 0.0563 |
| rs3812591  | -1.029 | 0.3034 | ++  | 0.00090 | 0.5691 | 0.5287 |
| rs791995   | -1.023 | 0.3061 | --+ | 0.00089 | 0.1709 | 0.0300 |

|            |        |        |    |         |        |        |
|------------|--------|--------|----|---------|--------|--------|
| rs10152711 | -1.02  | 0.3076 | ++ | 0.00015 | 0.9508 | 0.1573 |
| rs11703384 | -1.013 | 0.3109 | ++ | 0.00055 | 0.1718 | 0.8949 |
| rs7799805  | 1.01   | 0.3124 | +- | 0.00051 | 0.7581 | 0.1406 |
| rs7692604  | -1.01  | 0.3127 | ++ | 0.00085 | 0.7283 | 0.3967 |
| rs17018646 | -1.005 | 0.3147 | +- | 0.00060 | 0.0238 | 0.5616 |
| rs6946440  | 1      | 0.3175 | +- | 0.00020 | 0.6197 | 0.2935 |
| rs772475   | -0.99  | 0.3221 | +- | 0.00077 | 0.1366 | 0.9974 |
| rs1919814  | 0.99   | 0.3223 | +- | 0.00039 | 0.7739 | 0.2746 |
| rs9662096  | -0.989 | 0.3228 | ++ | 0.00057 | 0.7137 | 0.3432 |
| rs8138344  | -0.985 | 0.3246 | ++ | 0.00024 | 0.7330 | 0.2486 |
| rs7310544  | 0.977  | 0.3286 | ++ | 0.00042 | 0.0742 | 0.0045 |
| rs569953   | -0.974 | 0.3302 | ++ | 0.00032 | 0.0963 | 0.9431 |
| rs17025554 | -0.949 | 0.3428 | ++ | 0.00071 | 0.2976 | 0.6677 |
| rs650169   | 0.942  | 0.3461 | +- | 0.00030 | 0.7911 | 0.2187 |
| rs473490   | -0.911 | 0.3622 | ++ | 0.00049 | 0.3274 | 0.5387 |
| rs1120533  | 0.901  | 0.3675 | ++ | 0.00058 | 0.0827 | 0.9957 |
| rs11622794 | 0.888  | 0.3747 | +- | 0.00085 | 0.3881 | 0.5342 |
| rs17374354 | 0.885  | 0.3764 | +- | 0.00061 | 0.0844 | 0.9857 |
| rs2812426  | 0.869  | 0.3847 | +- | 0.00028 | 0.4979 | 0.3018 |
| rs7974231  | -0.86  | 0.3901 | +- | 0.00054 | 0.4677 | 0.0438 |
| rs1659390  | 0.852  | 0.3942 | +- | 0.00084 | 0.9120 | 0.2036 |
| rs1438929  | -0.839 | 0.4015 | ++ | 0.00068 | 0.1958 | 0.6872 |
| rs1248627  | 0.836  | 0.403  | +- | 0.00026 | 0.6044 | 0.2225 |
| rs7961094  | 0.83   | 0.4063 | +- | 0.00091 | 0.4711 | 0.4209 |
| rs10104810 | -0.821 | 0.4114 | +- | 0.00028 | 0.0097 | 0.6843 |
| SNP_A-     |        |        |    |         |        |        |
| 1918836    | 0.82   | 0.4121 | +- | 0.00075 |        | 0.1061 |
| rs1344967  | 0.82   | 0.4123 | +- | 0.00024 | 0.5601 | 0.2259 |
| rs8007153  | 0.813  | 0.4165 | +- | 0.00059 | 0.0605 | 0.9899 |
| rs7535375  | 0.81   | 0.4178 | +- | 0.00063 | 0.8525 | 0.1026 |
| rs2812431  | 0.802  | 0.4225 | +- | 0.00023 | 0.5506 | 0.2178 |
| rs2812429  | 0.789  | 0.4302 | +- | 0.00042 | 0.5868 | 0.2397 |
| rs11123202 | -0.785 | 0.4322 | +- | 0.00043 | 0.7427 | 0.0629 |
| rs12446286 | -0.781 | 0.4345 | ++ | 0.00028 | 0.4672 | 0.2614 |
| rs11101238 | -0.777 | 0.4373 | ++ | 0.00056 | 0.2214 | 0.5520 |
| rs1240273  | 0.774  | 0.4389 | +- | 0.00018 | 0.2704 | 0.3551 |
| rs4302584  | -0.768 | 0.4422 | ++ | 0.00062 | 0.5457 | 0.2825 |
| rs2032033  | 0.765  | 0.4445 | +- | 0.00092 | 0.8887 | 0.1137 |
| rs11956352 | -0.754 | 0.4508 | ++ | 0.00057 | 0.5169 | 0.2804 |
| rs7522053  | 0.745  | 0.4564 | +- | 0.00075 | 0.8391 | 0.0879 |
| rs6667717  | 0.736  | 0.4617 | +- | 0.00082 | 0.9035 | 0.1024 |
| rs9970096  | 0.726  | 0.4677 | +- | 0.00092 | 0.8623 | 0.0958 |
| rs10170591 | -0.725 | 0.4683 | ++ | 0.00087 | 0.3104 | 0.4592 |
| rs11067660 | -0.705 | 0.4808 | ++ | 0.00095 | 0.9360 | 0.1364 |
| rs2774511  | 0.695  | 0.4868 | +- | 0.00059 | 0.5160 | 0.0289 |
| rs812796   | -0.663 | 0.5075 | +- | 0.00093 | 0.4572 | 0.3007 |
| rs1261990  | 0.663  | 0.5076 | +- | 0.00017 | 0.5797 | 0.1247 |
| rs847000   | 0.642  | 0.5206 | +- | 0.00011 | 0.6246 | 0.0896 |
| rs1438928  | -0.633 | 0.5265 | ++ | 0.00050 | 0.2478 | 0.3748 |
| rs1240276  | 0.609  | 0.5427 | +- | 0.00021 | 0.1870 | 0.3303 |
| rs1457440  | -0.608 | 0.5435 | +- | 0.00047 | 0.0112 | 0.8793 |
| rs13148787 | 0.574  | 0.566  | +- | 0.00035 | 0.3966 | 0.1963 |
| rs2435969  | -0.57  | 0.5687 | +- | 0.00039 | 0.0017 | 0.5932 |
| rs3904459  | -0.52  | 0.6031 | ++ | 0.00092 | 0.9197 | 0.0789 |
| rs1602204  | -0.508 | 0.6113 | ++ | 0.00093 | 0.1540 | 0.4670 |
| rs261771   | 0.503  | 0.6153 | +- | 0.00048 | 0.4740 | 0.1498 |



|            |        |        |     |         |        |        |
|------------|--------|--------|-----|---------|--------|--------|
| rs6818391  | 0.488  | 0.6257 | -++ | 0.00080 | 0.1721 | 0.0215 |
| rs224035   | 0.48   | 0.6315 | +-- | 0.00067 | 0.7932 | 0.0786 |
| rs359763   | -0.457 | 0.6477 | -+- | 0.00072 | 0.0027 | 0.7000 |
| rs6771167  | 0.388  | 0.6977 | +-- | 0.00096 | 0.0289 | 0.7653 |
| rs3209160  | -0.336 | 0.7372 | +-- | 0.00055 | 0.0382 | 0.1105 |
| rs3799339  | -0.198 | 0.8429 | +-- | 0.00023 | 0.1747 | 0.0330 |
| rs915200   | -0.169 | 0.866  | -++ | 0.00040 | 0.3212 | 0.0788 |
| rs1543940  | -0.162 | 0.871  | -++ | 0.00040 | 0.1555 | 0.1527 |
| rs1538974  | 0.065  | 0.9485 | +-- | 0.00029 | 0.0261 | 0.3121 |
| rs17148591 | -0.039 | 0.9692 | +-- | 0.00099 | 0.3683 | 0.0513 |
| rs1226485  | -0.034 | 0.9731 | -++ | 0.00070 | 0.6099 | 0.0262 |
| rs2236091  | 0.026  | 0.9793 | +-- | 0.00030 | 0.1333 | 0.1030 |
| rs11583715 | 0.018  | 0.9854 | +-- | 0.00045 | 0.0539 | 0.2222 |
| rs17748239 | 0.012  | 0.9903 | +-- | 0.00034 | 0.0319 | 0.2637 |
| rs11585959 | 0.011  | 0.9911 | +-- | 0.00023 | 0.0246 | 0.2657 |
| rs10759217 | 0.004  | 0.9966 | +-- | 0.00053 | 0.1477 | 0.1126 |

Meta-analysis of three GWAS (Sorbs, N=929, 58BC, N=1490 and DGI, N=1496). Only SNPs associated with P-values <0.001 with adult height in the Sorbian sample were included in this analysis. P-values in the Sorbian cohort are corrected for age, gender, genomic control inflation factor ( $\lambda=1.31$ ) and the first four vectors of multidimensional scaling. + / - indicates the effect direction relative to the minor allele.

Supplementary Figure 1

Histogram of pairwise IBD of all Sorbian subjects included in the analyses. A) all subjects, B)  $\pi_{\text{hat}} < 0.25$ , C)  $\pi_{\text{hat}} < 0.1$

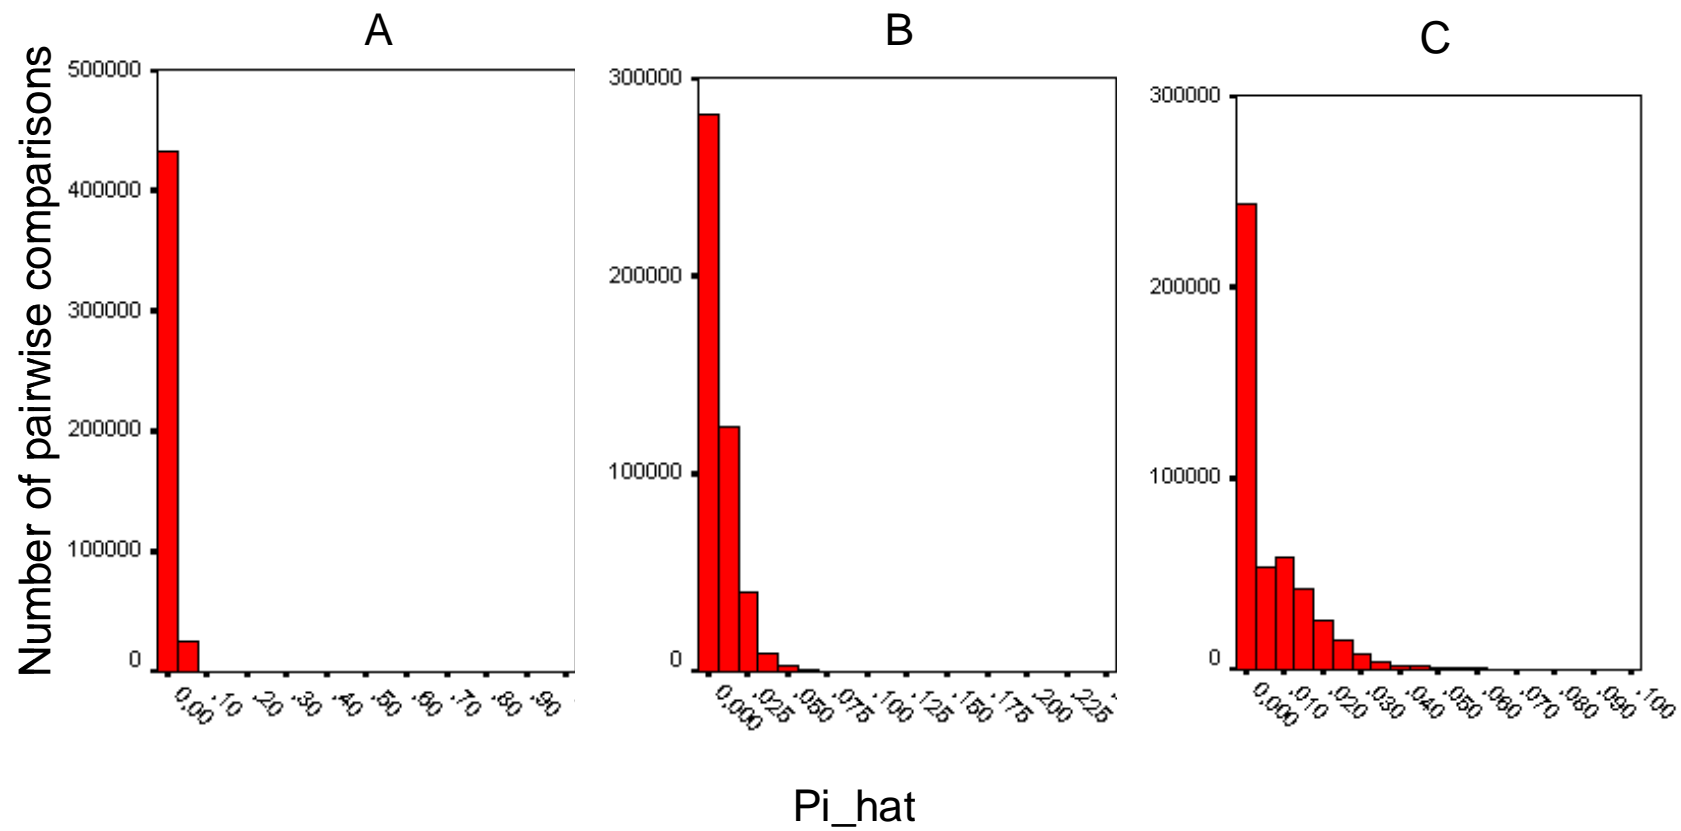

Supplementary Figure 2

QQ-Plot before and after correction for genomic control ( $\lambda=1.31$ )

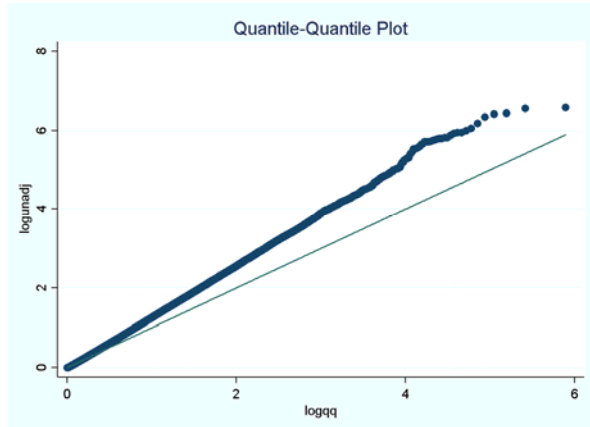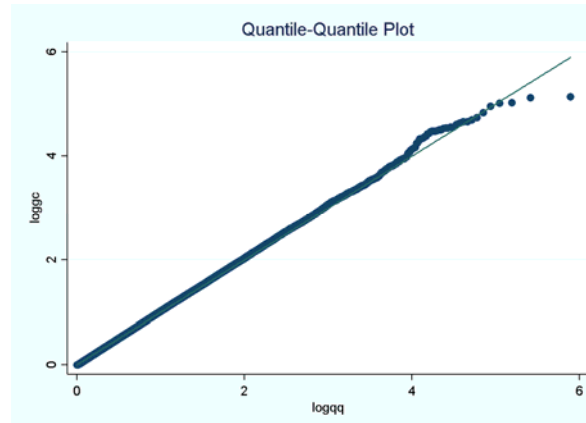

Supplement: ddp423_1.pdf [file ddp423_1.pdf]
